# Supplementary material for: Meta-analysis of randomised controlled trials testing behavioural interventions to promote household action on climate change
Source: PubMed Central journal article supplement (PMC6778105; doi:10.1038/s41467-019-12457-2), 2019-10-04
Supplement: 41467_2019_12457_MOESM1_ESM.pdf [file 41467_2019_12457_MOESM1_ESM.pdf]

## Supplementary Information

Meta-analysis of randomised controlled trials testing behavioural interventions to promote household action on climate change

Nisa et al.

|                                |   |
|--------------------------------|---|
| Supplementary Figure 1 .....   | 2 |
| Supplementary Table 1 .....    | 3 |
| Supplementary References ..... | 5 |

## Supplementary Figures

Supplementary Figure 1. Prisma Flow

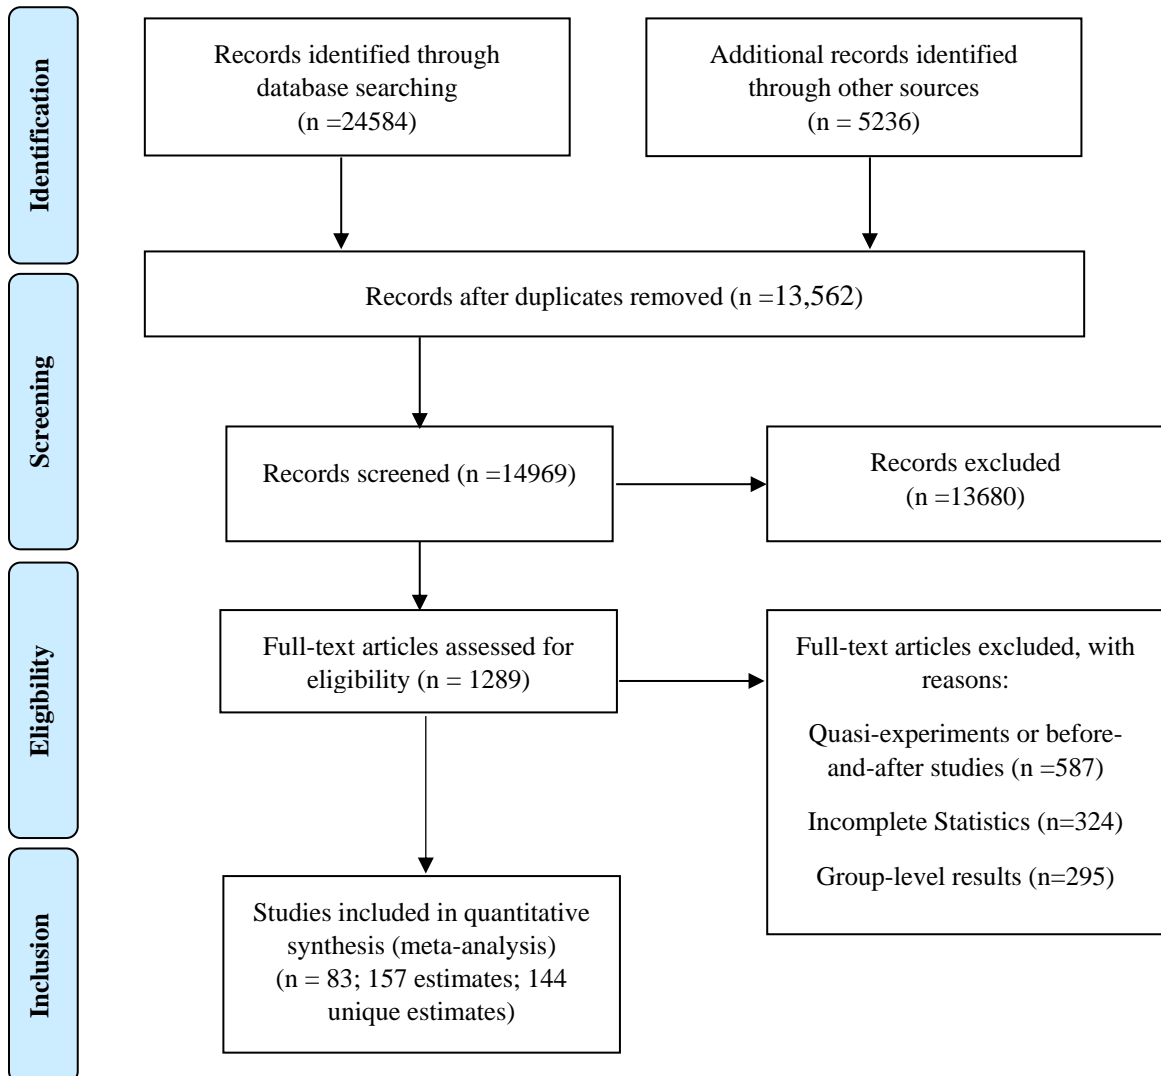

From: Moher D, Liberati A, Tetzlaff J, Altman DG, The PRISMA Group (2009). Preferred Reporting Items for Systematic Reviews and Meta-Analyses: The PRISMA Statement. *PLoS Med* 6(7): e1000097. doi:10.1371/journal.pmed1000097. For more information [www.prisma-statement.org](http://www.prisma-statement.org)

## Supplementary Tables

Supplementary Table 1. PRISMA STATEMENT

The 27 checklist items represent the best practices for reporting the content of systematic reviews and meta-analysis, which include the title, abstract, methods, results, discussion and funding (From: Moher D, Liberati A, Tetzlaff J, Altman DG, The PRISMA Group (2009). Preferred Reporting Items for Systematic Reviews and Meta-Analyses: The PRISMA Statement. PLoS Med 6(7): e1000097)

| Section/topic                      | #  | Checklist item                                                                                                                                                                                                                                                                                              | Reported on page # |
|------------------------------------|----|-------------------------------------------------------------------------------------------------------------------------------------------------------------------------------------------------------------------------------------------------------------------------------------------------------------|--------------------|
| <b>TITLE</b>                       |    |                                                                                                                                                                                                                                                                                                             |                    |
| Title                              | 1  | Identify the report as a systematic review, meta-analysis, or both.                                                                                                                                                                                                                                         | 1                  |
| <b>ABSTRACT</b>                    |    |                                                                                                                                                                                                                                                                                                             |                    |
| Structured summary                 | 2  | Provide a structured summary including, as applicable: background; objectives; data sources; study eligibility criteria, participants, and interventions; study appraisal and synthesis methods; results; limitations; conclusions and implications of key findings; systematic review registration number. | 2                  |
| <b>INTRODUCTION</b>                |    |                                                                                                                                                                                                                                                                                                             |                    |
| Rationale                          | 3  | Describe the rationale for the review in the context of what is already known.                                                                                                                                                                                                                              | 3                  |
| Objectives                         | 4  | Provide an explicit statement of questions being addressed with reference to participants, interventions, comparisons, outcomes, and study design (PICOS).                                                                                                                                                  | 3-4                |
| <b>METHODS</b>                     |    |                                                                                                                                                                                                                                                                                                             |                    |
| Protocol and registration          | 5  | Indicate if a review protocol exists, if and where it can be accessed (e.g., Web address), and, if available, provide registration information including registration number.                                                                                                                               | N.A.               |
| Eligibility criteria               | 6  | Specify study characteristics (e.g., PICOS, length of follow-up) and report characteristics (e.g., years considered, language, publication status) used as criteria for eligibility, giving rationale.                                                                                                      | 3-4, 12            |
| Information sources                | 7  | Describe all information sources (e.g., databases with dates of coverage, contact with study authors to identify additional studies) in the search and date last searched.                                                                                                                                  | 12                 |
| Search                             | 8  | Present full electronic search strategy for at least one database, including any limits used, such that it could be repeated.                                                                                                                                                                               | 12, SI p.17        |
| Study selection                    | 9  | State the process for selecting studies (i.e., screening, eligibility, included in systematic review, and, if applicable, included in the meta-analysis).                                                                                                                                                   | 12, SI p.17        |
| Data collection process            | 10 | Describe method of data extraction from reports (e.g., piloted forms, independently, in duplicate) and any processes for obtaining and confirming data from investigators.                                                                                                                                  | 12                 |
| Data items                         | 11 | List and define all variables for which data were sought (e.g., PICOS, funding sources) and any assumptions and simplifications made.                                                                                                                                                                       | 12, SI p.18-22     |
| Risk of bias in individual studies | 12 | Describe methods used for assessing risk of bias of individual studies (including specification of whether this was done at the                                                                                                                                                                             | 4-6, 12-13         |

|                               |    |                                                                                                                                                                                                          |                    |
|-------------------------------|----|----------------------------------------------------------------------------------------------------------------------------------------------------------------------------------------------------------|--------------------|
|                               |    | study or outcome level), and how this information is to be used in any data synthesis.                                                                                                                   |                    |
| Summary measures              | 13 | State the principal summary measures (e.g., risk ratio, difference in means).                                                                                                                            | 2-3, 5, 12         |
| Synthesis of results          | 14 | Describe the methods of handling data and combining results of studies, if done, including measures of consistency (e.g., $I^2$ ) for each meta-analysis.                                                | 5, 12-13, SI 18-22 |
| Risk of bias across studies   | 15 | Specify any assessment of risk of bias that may affect the cumulative evidence (e.g., publication bias, selective reporting within studies).                                                             | 5, 12-13, SI 18-22 |
| Additional analyses           | 16 | Describe methods of additional analyses (e.g., sensitivity or subgroup analyses, meta-regression), if done, indicating which were pre-specified.                                                         | 5, 12-13, SI 18-22 |
| <b>RESULTS</b>                |    |                                                                                                                                                                                                          |                    |
| Study selection               | 17 | Give numbers of studies screened, assessed for eligibility, and included in the review, with reasons for exclusions at each stage, ideally with a flow diagram.                                          | 4, 12, SI p.17     |
| Study characteristics         | 18 | For each study, present characteristics for which data were extracted (e.g., study size, PICOS, follow-up period) and provide the citations.                                                             | SI p.18-22         |
| Risk of bias within studies   | 19 | Present data on risk of bias of each study and, if available, any outcome level assessment (see item 12).                                                                                                | 4-6, 12-13         |
| Results of individual studies | 20 | For all outcomes considered (benefits or harms), present, for each study: (a) simple summary data for each intervention group (b) effect estimates and confidence intervals, ideally with a forest plot. | SI Database        |
| Synthesis of results          | 21 | Present results of each meta-analysis done, including confidence intervals and measures of consistency.                                                                                                  | 5                  |
| Risk of bias across studies   | 22 | Present results of any assessment of risk of bias across studies (see Item 15).                                                                                                                          | 5-7, 12-13         |
| Additional analysis           | 23 | Give results of additional analyses, if done (e.g., sensitivity or subgroup analyses, meta-regression [see Item 16]).                                                                                    | 5-7                |
| <b>DISCUSSION</b>             |    |                                                                                                                                                                                                          |                    |
| Summary of evidence           | 24 | Summarize the main findings including the strength of evidence for each main outcome; consider their relevance to key groups (e.g., healthcare providers, users, and policy makers).                     | 1, 5-9             |
| Limitations                   | 25 | Discuss limitations at study and outcome level (e.g., risk of bias), and at review-level (e.g., incomplete retrieval of identified research, reporting bias).                                            | 10-12              |
| Conclusions                   | 26 | Provide a general interpretation of the results in the context of other evidence, and implications for future research.                                                                                  | 9-12               |
| <b>FUNDING</b>                |    |                                                                                                                                                                                                          |                    |
| Funding                       | 27 | Describe sources of funding for the systematic review and other support (e.g., supply of data); role of funders for the systematic review.                                                               | 14                 |

## Supplementary References

1. Aittasalo, M., Rinne, M., Pasanen, M., Kukkonen-Harjula, K., & Vasankari, T. (2012). Promoting walking among office employees—evaluation of a randomized controlled intervention with pedometers and e-mail messages. *BMC Public Health*, *12*(1), 403.
2. Allcott, H. (2011). Social norms and energy conservation. *Journal of Public Economics*, *95*(Special Issue: The Role of Firms in Tax Systems), 1082-1095. doi:10.1016/j.jpubeco.2011.03.003
3. Allcott, H., & Sweeney, R. L. (2017). The role of sales agents in information disclosure: evidence from a field experiment. *Management Science*, *63*(1), 21-39.
4. Anderson, C. D., & Claxton, J. D. (1982). Barriers to consumer choice of energy efficient products. *Journal of Consumer Research*, *9*(2), 163-170.
5. Anderson, K., Song, K., Lee, S., Krupka, E., Lee, H., & Park, M. (2017). Longitudinal analysis of normative energy use feedback on dormitory occupants. *Applied energy*, *189*, 623-639.
6. Ascensio, O. I., & Delmas, M. A. (2015). Nonprice incentives and energy conservation. *Proceedings of the National Academy of Sciences*, 201401880.
7. Baca-Motes, K., Brown, A., Gneezy, A., Keenan, E. A., & Nelson, L. D. (2013). Commitment and behaviour change: Evidence from the field. *Journal of Consumer Research*, *39*(5), 1070-1084.
8. Bamberg, S. (2006). Is a residential relocation a good opportunity to change people's travel behaviour? Results from a theory-driven intervention study. *Environment and behaviour*, *38*(6), 820-840.
9. Bamberg, S., & Rees, J. (2017). The impact of voluntary travel behaviour change measures—A meta-analytical comparison of quasi-experimental and experimental evidence. *Transportation Research Part A: Policy and Practice*, *100*, 16-26.
10. Bapuji, H., Hora, M., & Saeed, A. M. (2012). Intentions, intermediaries, and interaction: Examining the emergence of routines. *Journal of Management Studies*, *49*(8), 1586-1607.
11. Becker, L. J. (1978). Joint effect of feedback and goal setting on performance: A field study of residential energy conservation. *Journal of applied psychology*, *63*(4), 428.
12. Bohner, G., & Schlüter, L. E. (2014). A room with a viewpoint revisited: Descriptive norms and hotel guests' towel reuse behaviour. *PloS one*, *9*(8), e104086.
13. Bryce, W. J., Day, R., & Olney, T. J. (1997). Commitment approach to motivating community recycling: New Zealand curbside trial. *The Journal of Consumer Affairs*, 27-52.
14. Burn, S. M. (1991). Social Psychology and the Stimulation of Recycling Behaviours: The Block Leader Approach. *Journal of Applied Social Psychology*, *21*(8), 611.
15. Burn, S. M., & Oskamp, S. (1986). Increasing community recycling with persuasive communication and public commitment. *Journal of Applied Social Psychology*, *16*(1), 29-41.
16. Carrico, A. R., & Riemer, M. (2011). Motivating energy conservation in the workplace: An evaluation of the use of group-level feedback and peer education. *Journal of Environmental Psychology*, 311-13. doi:10.1016/j.jenvp.2010.11.004
17. Carroll, J., Denny, E., & Lyons, S. (2016). The effects of energy cost labelling on appliance purchasing decisions: trial results from Ireland. *Journal of consumer policy*, *39*(1), 23-40.
18. Chen, V. L., Delmas, M. A., Locke, S. L., & Singh, A. (2017). Information strategies for energy conservation: A field experiment in India. *Energy Economics*, *68*, 215-227.
19. Christina, S., Dainty, A., Daniels, K., Tregaskis, O., & Waterson, P. (2017). Shut the fridge door! HRM alignment, job redesign and energy performance. *Human Resource Management Journal*, *27*(3), 382-402.
20. Clayton, M., & Nesnidol, S. (2017). Reducing electricity use on campus: The use of prompts, feedback, and goal setting to decrease excessive classroom lighting. *Journal of Organizational Behaviour Management*, *37*(2), 196-206.
21. Cobern, M. K., Porter, B. E., Leeming, F. C., & Dwyer, W. O. (1995). The effect of commitment on adoption and diffusion of grass cycling. *Environment and Behaviour*, *27*(2), 213-232.
22. Costa, D. L., & Kahn, M. E. (2013). Energy conservation “nudges” and environmentalist ideology: evidence from a randomized residential electricity field experiment. *Journal of the European Economic Association*, *11*(3), 680-702.
23. Datta, S., Miranda, J. J., Zoratto, L., Calvo-González, O., Darling, M., & Lorenzana, K. (2015). A behavioural approach to water conservation: evidence from Costa Rica. *The World Bank*

<https://openknowledge.worldbank.org/bitstream/handle/10986/22156/A0behavioural0a0ence0from0Costa0Rica.pdf?sequence=1>

24. Delmas, M. A., & Lessem, N. (2014). Saving power to conserve your reputation? The effectiveness of private versus public information. *Journal of Environmental Economics and Management*, 67(3), 353-370. doi:10.1016/j.jeem.2013.12.009
25. Dickerson, C. A. (1992). Using Cognitive Dissonance to Encourage Water Conservation. *Journal of Applied Social Psychology*, 22(11), 841-854.
26. Dolan, P., & Metcalfe, R. (2013). Neighbors, knowledge, and nuggets: two natural field experiments on the role of incentives on energy conservation.
27. Eriksson, L., Garvill, J., & Nordlund, A. M. (2008). Interrupting habitual car use: The importance of car habit strength and moral motivation for personal car use reduction. *Transportation Research Part F: Traffic Psychology and Behaviour*, 11(1), 10-23.
28. Ferraro, P. J., & Price, M. K. (2013). Using nonpecuniary strategies to influence behaviour: evidence from a large-scale field experiment. *Review of Economics and Statistics*, 95(1), 64-73.
29. Fielding, K. S., Spinks, A., Russell, S., McCrea, R., Stewart, R., & Gardner, J. (2013). An experimental test of voluntary strategies to promote urban water demand management. *Journal of Environmental Management*, 114(3), 343-351. doi:10.1016/j.jenvman.2012.10.027
30. Friis, R., Skov, L. R., Olsen, A., Appleton, K. M., Saulais, L., Dinnella, C., & Perez-Cueto, F. J. (2017). Comparison of three nudge interventions (priming, default option, and perceived variety) to promote vegetable consumption in a self-service buffet setting. *PloS one*, 12(5), e0176028.
31. Fujii, S., & Taniguchi, A. (2005). Reducing family car-use by providing travel advice or requesting behavioural plans: An experimental analysis of travel feedback programs. *Transportation Research Part D: Transport and Environment*, 10(5), 385-393 [duplicate Taniguchi, A., & Fujii, S. (2007). Promoting public transport using marketing techniques in mobility management and verifying their quantitative effects. *Transportation*, 34(1), 37.]
32. Garvill, J., Marell, A., & Nordlund, A. (2003). Effects of increased awareness on choice of travel mode. *Transportation*, 30(1), 63-79.
33. Goldstein, N. J., Cialdini, R. B., & Griskevicius, V. (2008). A room with a viewpoint: Using social norms to motivate environmental conservation in hotels. *Journal of consumer Research*, 35(3), 472-482.
34. Goldstein, N. J., Griskevicius, V., & Cialdini, R. B. (2011). Reciprocity by proxy: A novel influence strategy for stimulating cooperation. *Administrative Science Quarterly*, 56(3), 441-473.
35. Goodhew, J., Pahl, S., Auburn, T., & Goodhew, S. (2015). Making heat visible: promoting energy conservation behaviours through thermal imaging. *Environment and Behaviour*, 47(10), 1059-1088.
36. Goodman, A., Panter, J., Sharp, S. J., & Ogilvie, D. (2013). Effectiveness and equity impacts of town-wide cycling initiatives in England: a longitudinal, controlled natural experimental study. *Social Science & Medicine*, 97, 228-237.
37. Handgraaf, M. J., de Jeude, M. A. V. L., & Appelt, K. C. (2013). Public praise vs. private pay: Effects of rewards on energy conservation in the workplace. *Ecological Economics*, 86, 86-92.
38. Hemmingsson, E., Udden, J., Neovius, M., Ekelund, U., & Rössner, S. (2009). Increased physical activity in abdominally obese women through support for changed commuting habits: a randomized clinical trial. *International journal of obesity*, 33(6), 645.
39. Holland, R. W., Aarts, H., & Langendam, D. (2006). Breaking and creating habits on the working floor: A field-experiment on the power of implementation intentions. *Journal of Experimental Social Psychology*, 42(7), 776-783. doi:10.1016/j.jesp.2005.11.006
40. Houde, S., Todd, A., Sudarshan, A., Flora, J. A., & Armel, K. C. (2013). Real-time feedback and electricity consumption: A field experiment assessing the potential for savings and persistence. *The Energy Journal*, 34(1), 87.
41. Hsieh, H. S., Kanda, Y., & Fujii, S. (2017). Reducing car use by volitional strategy of action and coping planning enhancement. *Transportation research part F: traffic psychology and behaviour*, 47, 163-175.
42. Hutton, R. B., & Ahtola, O. T. (1991). Consumer response to a five-year campaign to combat air pollution. *Journal of Public Policy & Marketing*, 24(2), 242-256.

43. Jeong, S. H., Gulbinas, R., Jain, R. K., & Taylor, J. E. (2014). The impact of combined water and energy consumption eco-feedback on conservation. *Energy and Buildings*, 80, 114-119.
44. Kallbekken, S., & Sælen, H. (2013). ‘Nudging’ hotel guests to reduce food waste as a win-win environmental measure. *Economics Letters*, 119(3), 325-327.
45. Kallbekken, S., Sælen, H., & Hermansen, E. A. (2013). Bridging the energy efficiency gap: A field experiment on lifetime energy costs and household appliances. *Journal of Consumer Policy*, 36(1), 1-16.
46. Katzev, R. D., & Pardini, A. U. (1987). The comparative effectiveness of reward and commitment approaches in motivating community recycling. *Journal of Environmental Systems*, 17(2), 93-113.
47. Katzev, R., Cooper, L., & Fisher, P. (1980). The effect of feedback and social reinforcement on residential electricity consumption. *Journal of Environmental Systems*, 10(3), 215-227.
48. Kendel, A., Lazaric, N., & Maréchal, K. (2017). What do people ‘learn by looking’ at direct feedback on their energy consumption? Results of a field study in Southern France. *Energy Policy*, 108, 593-605.
49. Kongsbak, I., Skov, L. R., Nielsen, B. K., Ahlmann, F. K., Schaldemose, H., Atkinson, L., & Pérez-Cueto, F. J. (2016). Increasing fruit and vegetable intake among male university students in an ad libitum buffet setting: A choice architectural nudge intervention. *Food quality and preference*, 49, 183-188.
50. Kurz, T., Donaghue, N., & Walker, I. (2005). Utilizing a Social-Ecological Framework to Promote Water and Energy Conservation: A Field Experiment. *Journal of Applied Social Psychology*, 35(6), 1281-1300.
51. Lynham, J., Nitta, K., Saijo, T., & Tarui, N. (2016). Why does real-time information reduce energy consumption? *Energy Economics*, 54, 173-181.
52. Mair, J., & Bergin-Seers, S. (2010). The effect of interventions on the environmental behaviour of Australian motel guests. *Tourism and Hospitality Research*, 10(4), 255-268.
53. Matsukawa, I. (2004). The Effects of Information on Residential Demand for Electricity. *The Energy Journal*, 25(1), 1-18.
54. McCaul, K. D., & Kopp, J. T. (1982). Effects of Goal Setting and Commitment on Increasing Metal Recycling. *Journal of Applied Psychology*, 67(3), 377-379.
55. Mutrie, N., Carney, C., Blamey, A., Crawford, F., Aitchison, T., & Whitelaw, A. (2002). “Walk in to Work Out”: a randomised controlled trial of a self-help intervention to promote active commuting. *Journal of Epidemiology & Community Health*, 56(6), 407-412.
56. Nolan, J. M., Schultz, P. W., Cialdini, R. B., Goldstein, N. J., & Griskevicius, V. (2008). Normative social influence is underdetected. *Personality and social psychology bulletin*, 34(7), 913-923.
57. Pardini, A. U., & Katzev, R. D. (1983). The effect of strength of commitment on newspaper recycling. *Journal of Environmental Systems*, 13(3), 245-254.
58. Qi, D., & Roe, B. E. (2017). Foodservice composting crowds out consumer food waste reduction behaviour in a dining experiment. *American Journal of Agricultural Economics*, 99(5), 1159-1171.
59. Reese, G., Loew, K., & Steffgen, G. (2014). A towel less: Social norms enhance pro-environmental behaviour in hotels. *The Journal of social psychology*, 154(2), 97-100.
60. Rowland, D., DiGuseppi, C., Gross, M., Afolabi, E., & Roberts, I. (2003). Randomised controlled trial of site specific advice on school travel patterns. *Archives of disease in childhood*, 88(1), 8-11.
61. Sargeant, J., Carter, T., McSweeney, S., & Hughes, W. (2004a). Cambridgeshire Travel Choice Project: New Recruit. *Department for Transport, Cambridgeshire County Council, Cambridge University Hospitals NHS Foundation Trust, Cambridgeshire Travel for Work Partnership, Cambridge, UK, Final Report*.
62. Sargeant, J., Carter, T., McSweeney, S., & Hughes, W. (2004b). Cambridgeshire Travel Choice Project: Addenbrooke's Hospital. *Department for Transport, Cambridgeshire County Council, Cambridge University Hospitals NHS Foundation Trust, Cambridgeshire Travel for Work Partnership, Cambridge, UK, Final Report*.
63. Sargeant, J., Carter, T., McSweeney, S., & Hughes, W. (2004c). Cambridgeshire Travel Choice Project: Car Park. *Department for Transport, Cambridgeshire County Council, Cambridge University Hospitals NHS Foundation Trust, Cambridgeshire Travel for Work Partnership, Cambridge, UK, Final Report*.

64. Schleich, J., Klobasa, M., Gözl, S., & Brunner, M. (2013). Effects of feedback on residential electricity demand—Findings from a field trial in Austria. *Energy Policy*, 61, 1097-1106.
65. Schultz, P. W. (1998). Changing Behaviour with Normative Feedback Interventions: A Field Experiment on Curbside Recycling. *Basic & Applied Social Psychology*, 21(1), 25-36.
66. Schultz, P. W., Nolan, J. M., Cialdini, R. B., Goldstein, N. J., & Griskevicius, V. (2008). The Constructive, Destructive, and Reconstructive Power of Social Norms. *Psychological Science* (Wiley-Blackwell), 18(5), 429-434. doi:10.1111/j.1467-9280.2007.01917.x
67. Schultz, P. W., Estrada, M., Schmitt, J., Sokoloski, R., & Silva-Send, N. (2015). Using in-home displays to provide smart meter feedback about household electricity consumption: A randomized control trial comparing kilowatts, cost, and social norms. *Energy*, 90, 351-358.
68. Schultz, P. W., Messina, A., Tronu, G., Limas, E. F., Gupta, R., & Estrada, M. (2016). Personalized normative feedback and the moderating role of personal norms a field experiment to reduce residential water consumption. *Environment and Behaviour*, 0013916514553835.
69. Schwartz, D., Fischhoff, B., Krishnamurti, T., & Sowell, F. (2013). The Hawthorne effect and energy awareness. *Proceedings of the National Academy of Sciences*, 110(38), 15242-15246.
70. Seligman, C., & Darley, J. M. (1976). Feedback as a means of decreasing residential energy consumption. *Journal of Applied Psychology*, 62(4), 363.
71. Seyranian, V., Sinatra, G. M., & Polikoff, M. S. (2015). Comparing communication strategies for reducing residential water consumption. *Journal of Environmental Psychology*, 4181-90. doi:10.1016/j.jenvp.2014.11.009
72. Spaccarelli, S., Zolik, E., & Jason, L. A. (1989). Effects of verbal prompting and block characteristics on participation in curbside newspaper recycling. *Journal of Environmental Systems*, 19(1), 45-57.
73. Sparkman, G., & Walton, G. M. (2017). Dynamic norms promote sustainable behaviour, even if it is counternormative. *Psychological science*, 28(11), 1663-1674.
74. Sussman, R., & Gifford, R. (2011). Be the Change You Want to See Modeling Food Composting in Public Places. *Environment and Behaviour*, 45(3), 323-343.
75. Terrier, L., & Marfaing, B. (2015). Using social norms and commitment to promote proenvironmental behaviour among hotel guests. *Journal of Environmental Psychology*, 44, 10-15.
76. Tertoolen, G., Van Kreveld, D., & Verstraten, B. (1998). Psychological resistance against attempts to reduce private car use. *Transportation Research Part A: Policy and Practice*, 32(3), 171-181.
- Thompson, S. C., & Stoutemyer, K. (1991). Water Use as a Commons Dilemma The Effects of Education that Focuses on Long-Term Consequences and Individual Action. *Environment and Behaviour*, 23(3), 314-333.
77. Thondhlana, G., & Kua, H. W. (2016). Promoting household energy conservation in low-income households through tailored interventions in Grahamstown, South Africa. *Journal of Cleaner Production*, 131, 327-340.
78. Tørnblad, S. H., Kallbekken, S., Korneliussen, K., & Mideksa, T. K. (2014). Using mobility management to reduce private car use: Results from a natural field experiment in Norway. *Transport policy*, 32, 9-15.
79. Wansink, B., & Van Ittersum, K. (2013). Portion size me: Plate-size induced consumption norms and win-win solutions for reducing food intake and waste. *Journal of Experimental Psychology: Applied*, 19(4), 320.
80. Wen, L. M., Fry, D., Merom, D., Rissel, C., Dirakis, H., & Balafas, A. (2008). Increasing active travel to school: are we on the right track? A cluster randomised controlled trial from Sydney, Australia. *Preventive medicine*, 47(6), 612-618.
81. Werner, C. M., Turner, J., Shipman, K., Shawn Twitchell, F., Dickson, B. R., Brusckke, G. V., & von Bismarck, W. B. (1995). Commitment, behaviour, and attitude change: An analysis of voluntary recycling. *Journal Of Environmental Psychology*, 15(Green Psychology), 197-208.
82. Winett, R. A., Neale, M. S., & Grier, H. C. (1979). Effects of self-monitoring and feedback on residential electricity consumption. *Journal of Applied Behaviour Analysis*, 12(2), 173-184.
